# Supplementary material for: Stand-Alone Social Skills Training for Youth with ADHD: A Systematic Review
Source: Springer Nature journal article supplement (doi:10.1007/s10567-019-00291-3), 2019-02-22
Supplement: MOESM1 [file 16503602]

| **Online Supplemental Table**  **Stand-alone SST interventions for children with ADHD: A summary of samples characteristics, design features, content, and outcomes.** | | | | | | | |
| --- | --- | --- | --- | --- | --- | --- | --- |
|  | **Child Sample** | |  | **Overview** | | **SST Content** | **Outcomes** |
|  |  |  |  | |  |  |  |
| Fenstermacher et al. (2006) | *N* | 4 | Design | | Single-group | Video content presented peer actor who introduced target skill steps and demonstrated appropriate responses. Participants selected appropriate response to social scenarios in video; responses produced computer-generated feedback and provided prompts for appropriate response choices; points earned for selecting target skills; live role plays with confederate peers,  direct instruction, videotaped modeling, computer-facilitated rehearsal, prompting, feedback and reinforcement for performance during computer training (if applicable), role plays. | All participants demonstrated increases in mean levels (i.e., mean percentage of components) of social problem-solving skill behavioral performance from Baseline to Treatment (observed & rated during role plays), with average increases ranging from 8% to 39%. Effect sizes ranged from d=.55 to d=1.74. |
| Age | 10-13 y | Randomization | | NA |
|  | % Boys | 100% | Format | | Interactive, computer-based |
|  | % ADHD | 100% | Tx Duration | | 6 weeks; 2 50-min. sessions per week |
|  | % Stimulant medication | 25% | Delivery target | | Children |
|  |  |  | Outcome measures | | Child responses to computer-based social scenarios; researcher observations of child-confederate social interactions |
|  |  |  | Assessment schedule | | Baseline, 3 weeks and 6 weeks post-treatment |
|  |  |  |  | |  |  |  |
| Mikami et al. (2010b)A | *N* | 124 | Design | | Between-group: Tx (*n*=32), no-Tx ADHD control (*n*=30), no-Tx TD comparison (*n*=62) | Didactic instruction used to teach parents target skills, handouts, activities, role plays, and to review of videotape of each group members’ parent-child interactions. Parents were encouraged to identify ways the strategies could be tailored to their child’s specific needs. Homework was assigned each week and the previous week’s assignment was reviewed. | Tx predicted higher parent-reported child social skills at post-test but not teacher report. ODD moderated this association. Tx predicted continued improvement in parent-reported child friendships from post-test 1-month follow-up. Effect sizes were small to medium (range d=.25-d=.59). |
| Age | 6-10 y |  | |
|  | % Boys | 67.7% |  | |
|  | % ADHD | Tx: 100% | Randomization | | Yes; children with ADHD randomized to Tx or no-Tx control |
|  | % Stimulant medication | 63% ADHD Tx group; 67% ADHD no-Tx group; 0% TD comparison group; Parents asked to maintain their child’s medication status throughout the intervention | Format | | Small group session |
|  |  | Tx Duration | | 8 weekly 90-minute group sessions |
|  |  | Delivery target | | Parents |
|  |  | Outcome measures | | Playgroup observation (4 children: 2 with ADHD, 2 TD); parent phone interview about child peer relationships |
|  |  | Assessment schedule | | Baseline, post-test, 1-month follow-up |
|  |  |  |  | |  |  |  |
| Colton & Sheridan (1998) | *N* | 3 | Design | | Single-group | Conjoint Behavioral Consultation (CBC): Parents and teachers completed 3 structured, collaborative problem solving sessions with a consultant-psychologist. Stages of CBC: (1) problem identification (2) problem analysis (3) Tx implementation (4) Tx evaluation. During Tx, parents and teachers engaged child participants in brief daily coaching sessions (5-7 minutes each). Topics included: (i) review recess rules (ii) explain intervention materials to support skill use (using “friendship recipe cards”) (iii) discuss examples of skills and (iv) role play. Children self-monitored and rated their behavior during 3 recess periods per day. | Parent and teacher ratings indicated positive increases in overall social skills from pre- to post-test for 2 of the 3 child participants. Results of direct observations showed that average positive peer interactions increased from 27% pre-test to 61% during Tx.Average negative behaviors decreased from 5% pretreatment to 1.33% during treatment, but then increased to 4.2% at follow-up. Effect sizes were not reported. |
| Age | 8-9 y | Randomization | | NA |
| % Boys | 100% | Format | | 3 structured interviews w/ consultant-psychologist; brief daily coaching |
|  | % ADHD | 100% |  | |
|  | % Stimulant medication | 100%, Parents asked to maintain their child’s medication status throughout the intervention | Tx Duration | | 15 days |
|  |  | Delivery target | | Parents, teachers |
|  |  | Outcome measures | | SSRS1; other measures of ADHD symptoms and child social skills; observational measures |
|  |  | Assessment schedule | | Baseline, during Tx, 1-week and 3-week follow-up |
|  |  |  |  | |  |  |  |
| Wilkes-Gillan et al. (2016a)B | *N* | 18 | Design | | Single-group (*n*=9 with ADHD, *n*=9 without ADHD) | After completing a brief training, parents completed 12 video modules at home and facilitated an at-home play date for child and a familiar peer or sibling without ADHD. Parents also completed phone calls with therapist and observed therapist modeling social behaviors during additional child play sessions. Parents and therapist provided feedback to child about play date behaviors.  Children viewed 12 video modules focused on social difficulties of others with ADHD, observed therapist modeling of social behaviors, and participated in home- and clinic-based play dates with a familiar peer/sibling without ADHD. | Social skills of children with ADHD improved significantly from pre- to post-test with large effect size (d=1.0) Pattern of change continued from post-test to 1-month follow-up (d=.8).  At an 18-month follow-up with 5 participants, social play skills of children with ADHD and their playmates were maintained in the home and clinic setting Cantrill et al. (2015). Children with ADHD continued to have pragmatic language skills below that of a normative sample at 18-month follow-up (Wilkes-Gillan et al (2016c). |
| Age | 6-11 y |  | |
|  | % Boys | 66.7% | Randomization | | NA |
|  | % ADHD | 50% | Format | | 12 video modules, along with brief training, phone calls, and consultation with therapist |
|  | % Stimulant medication | 44% ADHD; Parents asked to maintain their child’s medication status throughout the intervention | Tx Duration | | 7 weeks |
|  |  | Delivery target | | Primarily parents |
|  |  | Outcome measures | | ToP3 and other measures of social behaviors |
|  |  | Assessment schedule | | Baseline, post-test, 1-month follow-up (with additional reports of 18-month follow-up) |
|  |  |  |  | |  |  |  |
|  |  |  |  | |  |  |  |
| Pfiffner & McBurnett (1997) | *N* | 27 | Design | | Between-group: Tx (*n*=9); Tx + parent (*n*=9); WLC (*n*=9) | Six modules were presented in child sessions: (1) good sportsmanship (2) accepting consequences (3) assertiveness (4) ignoring provocation (5) problem solving (6) recognizing & dealing w/ feelings. Child sessions were structured as follows: (1) Review of child’s practice and prizes earned at home. (2) Introduction of new “skill of the week” with extensive child participation and group challenge game (3) Extensive therapist modeling (4) Children role play of positive use of skill, using brief scripts of common problem situations with peers, siblings, parents, or in the classroom and ratings of each other’s social skill performance (5) 30-min. indoor or outdoor game (6) Assigned homework to practice skill of week at home & in school. In SST plus parent group, children were reminded that parents were also learning skills. Parents received psychoeducation on child social behavior, importance of social skills and social status, importance of parents’ role in helping their children improve peer relations. Parents were taught same skills & vocabulary as children’s modules. | Parent-reported social skills for pooled treatment (SST, SST plus parent) showed significant improvement compared to control with large effect size (d=2.34); no difference between parent ratings between 2 Tx groups. For teacher-reported social skills, SST plus parent showed significant improvement from pre- to post-test and from pre-test to 4-month follow-up with moderate effect size (d=.87);  For child-reported social skill knowledge: pooled Tx groups had significantly greater understanding and knowledge of skills taught in SST at post-test compared to control with large effect size (d=2.39). |
| Age | 8-10 y |  | |
| % Boys | 70% | Randomization | | Yes |
|  | % ADHD | 100% | Format | | Small group sessions |
|  | % Stimulant medication | 44%; Parents asked to maintain their child’s medication status throughout the intervention | Tx Duration | | 8 weekly 90-min. sessions |
|  |  | Delivery target | | Child (SST) or child and parent (SST plus parent training) |
|  |  | Outcome measures | | SSRS1 and other measures of child social behaviors |
|  |  |  | Assessment schedule | | Baseline, post-test, 3- and 4-month follow-up |
|  |  |  |  | |  |  |  |
|  |  |  |  | |  |  |  |
| Wilkes-Gillan et al. (2016b) | *N* | 58 | Design | | Between-group: Tx (*n*=15), WLC (*n*=14) | Tx involved child dyads (ADHD & TD peer/sibling) participating in a therapist-facilitated play-based intervention, with at-home parent-facilitated DVD modules, discussions, and play-dates. Clinic play sessions occurred in Weeks 1-3, 5, 7, & 10. Home-modules were completed with parent, and four at-home 40-minute play dates occurred in Weeks 4, 6, 8, and 9.  Clinic-based sessions involved (i) therapist-led video-feedback with children and parents; (ii) cooperative play while therapist modeled the desired pro-social skills; (iii) 15-min. therapist-parent discussion. Home-based video modules occurred in Weeks 8 and 9. Parents facilitated watching and discussing interactive manualized DVD modules, which demonstrated social negotiating and problem-solving. Parents facilitated home-based play dates  using feedback play cards. | Change in overall play skills of children with ADHD was significantly greater in Tx than WLC with large effect size (d=1.5 to 1.6).  No sig. difference found from post-test to 1-month follow-up, but treatment gains increased and were maintained (pre-intervention to follow-up) maintaining a large effect size (d=1.6). |
| Age | 5-11 y |  | |
|  | % Boys | 65.5% | Randomization | | Yes |
|  | % ADHD | 50% | Format | | Weekly play sessions (home and clinic-based) with at-home video modules |
|  | % Stimulant medication | 60% Tx; 79% WLC; Parents asked to maintain their child’s medication status throughout the study | Tx Duration | | 10 weeks |
|  |  | Delivery target(s) | | Children and parents |
|  |  | Outcome measures | | ToP3 |
|  |  | Assessment schedule | | Baseline, post-test, 1-month follow-up |
|  |  |  |  | |  |  |  |
| Antshel & Remer (2003) | N | 120 | Design | | Between-group: Tx, no-Tx C | Each group was comprised of children (*n*=8) characterized as either diagnostically heterogeneous (i.e., ADHD and non-ADHD) or diagnostically homogeneous. Topics/skills covered included:  1) cooperation with peers,  (2) problem solving,  (3) recognizing and controlling anger, (4) assertiveness,  (5) conversation, and (6) accepting consequences. Content delivery involved brief didactic instruction, behavioral modeling, behavior rehearsal, and role playing with peer performance evaluation as well as reward system and reinforcement. Points earned (e.g., for group attendance, following rules, participating, and completing homework) could be exchanged for games/activities. Brief redirections or time-outs for destructive behavior.  Parents completed 3 sessions during the 10-week intervention (i.e., at Weeks 1. 4, and 8) to assess progress and discuss behavior management techniques and exchange information with other parents. | Results did not support SST, particularly for children with comorbid ODD**.** When reexamined with ODD as a covariate, significant group effects emerged for parent-rated child Assertion, Cooperation, and Responsibility as well as child self-rated Self-Control and Empathy. Effect sizes were diminished at follow-up and evaluation of clinical significance indicated that the majority of participants remained unchanged on outcomes following SST. |
| Age | 8-12 y | Randomization | | Yes |
|  | % Boys | 75% | Format | | Small group sessions |
|  | % ADHD | 100% | Tx Duration | | 8 weekly 90-minute sessions |
|  | % Stimulant medication | 92% Tx; 93% Control; Parents asked to maintain their child’s medication status throughout the study | Delivery target | | Children and parents |
|  |  | Outcome measures | | SSRS1 |
|  |  | Assessment schedule | | Baseline, post-test, 3-month follow-up |
|  |  |  |  | |  |  |  |
| Storebø et al. (2012)C | *N* | 56 | Design | | Between-group: Tx (*n*=28), C (*n*=27) | Treatment group received SST with concurrent parent training and standard treatment with the goal of improving child ADHD symptoms and social behaviors/skills. Child and parent sessions were delivered concurrently. Control group received standard treatment only.  Child group sessions used didactic training (including work with symbols, games, creative techniques, music, story reading, and movies) to address the following themes: self-worth, nonverbal communication, feelings, impulse control, aggression management, conflict resolution, and problem solving.  Parent Tx group sessions addressed corresponding themes.  Standard treatment was offered to children in both groups and included medication for ADHD and general information about ADHD provided during 3 educational parent group meetings. | Results indicated no difference between treatment group and control group. Most outcomes changed significantly over time for both treatment and control groups. No group differences in attachment competencies at 6 months. Conclusion made that, based on sample size calculation and clinical relevance, no significant effects of SST. |
| Age | 8-12 y |  | |
|  | % Boys | 70% | Randomization | | Yes |
|  | % ADHD | 100% | Format | | Medium-size (*n*=12-16) group sessions |
|  | % Stimulant medication | 100% Tx, 100% Control | Tx Duration | | 8 weekly 90-minute sessions |
|  |  |  | Delivery target | | Child and parent |
|  |  |  | Outcome measures | | Assessments of child social behaviors |
|  |  |  | Assessment schedule | | Baseline, post-test (at 3 and 6 months post-randomization) |
|  |  |  |  | |  |  |  |
| Frankel et al. (1997) | *N* | 73 | Design | | Between-group: Tx (*n*=49, 71% ADHD), WLC (*n*=24, 50% ADHD) | Child and parent sessions were delivered concurrently. Child sessions introduced new social skills, including conversational techniques (e.g., voice volume, physical closeness), group entry techniques, responding to teasing, and handling confrontations with peers and adults. Weekly socialization homework included: (1) calling a peer from group on the phone to practice skills learned (2) bringing a nonviolent, interactive game to all sessions (3) practicing joining a group of children at play (4) at-home play dates. Group sessions were structured as follows: (1) review results of homework assignment given in previous session for 10 min. (2) didactic presentation, behavioral rehearsal between children, and coaching (3) coached play– children were paired in dyads to play games supported by therapist prompts, praise, & reinforcement (token system) of target social skills (4) parents & children reunited and contracts for homework were finalized.  Parent group sessions addressed corresponding themes and were structured as follows: (1) leader reviewed parent & child performance on previous socialization homework assignment (2) parent handout was read w/ parents & relevant questions were answered (3) new socialization homework was presented & discussion of specific anticipated problems (4) parent & child reunited for making contracts for completion of next assignment | The average Tx group participant had better ratings on all post-test outcomes than 83.4% of waitlist participants.  Parent-reported SSRS Assertion and Self-Control subscales showed significantly greater improvement for Tx compared to WLC. For each outcome variable, differences between Tx and WLC were at least marginally significant, including Likability, Aggression,  Self-Control, Assertion  Treatment generalization was found to be comparable for children with and without ODD. Effect sizes were large, ranging from d=.93 to d= 1.34 |
| Age | 6-12 y |  | |
| % Boys | 78% |  | |
| % ADHD | 64% | Randomization | | NR |
|  | % Stimulant medication | 100% ADHD; Parents asked to maintain their child’s medication status throughout the study | Format | | Small group sessions |
|  |  | Tx Duration | | 12 weekly, 60-minute sessions |
|  |  | Delivery target | | Children and parents |
|  |  | Outcome measures | | Assertion and Self-Control subscales of the SSRS1; other measures of social behaviors and ADHD |
|  |  | Assessment schedule | | Baseline and post-test |
|  |  |  |  | |  |  |  |
| Hantson et al. (2012) | N | 48 | Design | | Between-group: Tx, no-Tx C | Children participated in daily small group training sessions at a summer camp. Daily sessions included social skills training (manualized), as well as music, play, exercise, and art therapies/activities. Topics/skills covered included: (1) introducing yourself, (2) joining in, (3) knowing your feelings, (4) dealing with anger, (5) self-control, (6) responding to teasing, and (7) staying out of fights.  Parents completed **f**our 2-hour sessions over two weeks. Topics covered included ADHD symptom identification, pharmacological treatment, importance of play and establishing positive parent-child relationship, effective praise and rewards, discipline and time-out, importance of structure, how to approach systems (e.g., after-school programs, other services). | Treatment group showed significant improvements in all but one of the assessed domains compared to control group. Control group did not show improvements in any tested domains. Effect sizes ranged from medium to large, (d=.7 to d=1.6). |
| Age | 6-12 y | Randomization | | No |
|  | % Boys | 71% | Format | | Small group sessions |
|  | % ADHD | 100% | Tx Duration | | 2 weeks, with 5-6 hours of daily Tx |
|  | % Stimulant medication | 65% Tx; 60% Control; Parents asked to maintain their child’s medication status throughout the study | Delivery target | | Children and parents |
|  |  | Outcome measures | | CBCL2 and other measures of child social functioning |
|  |  | Assessment schedule | | Baseline, post-test, 3-week follow-up |
|  |  |  |  | |  |  |  |
| Huang et al. (2015) | *N* | 97 | Design | | Between-group: Tx (*n*=45), C (*n*=52) | Child group sessions covered topics/skills including: (1) making introductions and basic social skills, (2) listening to others,  (3) self-expectations, (4) self-awareness of own feelings, (5) learning to understand how others feel/how to empathize, (6) controlling anger/solving conflicts with peers/siblings, and (7) how to give a compliment. Content delivery involved didactic instructions, modeling, role-play activities, and behavior rehearsal as well as weekly homework, a token system to reinforce positive social behavior and reduce socially inappropriate behavior and feedback from group leaders and members.  Parent completed training/ psychoeducationon topics that included:  (1) ADHD, (2) behavioral treatment. (3) parenting attitudes,  (4) managing children’s misbehavior and emotions,  (5) managing parental emotional stress, (6) empathizing with and giving children compliments, (7) feedback on child performance by the leader of the child group, and (8) ADHD medication. | Children in Tx group showed significantly reduced parent-reported oppositional behaviors, anxiety, and depression and significantly increased child self-reported self-control and teacher-reported active participation. Improvements on oppositional behaviors & self-control were not sustained at 4-month follow-up. Children who had good medication compliance had better outcomes, showing significantly decreased scores on Thought Problems and Delinquent Behavior subscales, and significantly increased self-reported Cooperative Behavior, Positive Assertion, Negative Assertion, and Self-Control. |
| Age | 7-10 y |  | |
|  | % Boys | 82.5% | Randomization | | No |
|  | % ADHD | 100% | Format | | Small group sessions |
|  | % Stimulant medication | 100% Tx; 100% Control | Tx Duration | | 8 weekly 80-minute sessions |
|  |  |  | Delivery target(s) | | Children and parents |
|  |  |  | Outcome measures | | SSRS1, CBCL2, other measures |
|  |  |  | Assessment schedule | | Baseline, post-test, 4-month follow-up |
|  |  |  |  | |  |  |  |
| Schuck et al. (2013) | *N* | 24 | Design | | Between-group (Tx, Tx plus canine assist; immediate or delay participation) | In both groups, children received programming targeting the following social skills: accepting consequences, ignoring provocation, appropriate assertiveness, social problem solving, cooperation, and good sportsmanship. Children in the  canine-assisted group included certified therapy dogs and handlers, while non-canine group received same standard treatment curriculum but utilized toy dogs (i.e., realistic puppets).  Parents participated in group sessions focused on behavior modification techniques to target and modify child’s specific problematic behaviors using positive reinforcement (e.g., labeled praise), nonphysical discipline (e.g., planned ignoring, time-outs), and standard parenting strategies. Techniques were used to facilitate anger management and targeted social skills, address common parenting challenges frequently associated with ADHD. Children and parents had shared homework activities. | No differences in rate of improvement for social skills between canine assisted (CAI) and non-canine assisted (non-CAI) groups, but CAI group had greater reduction in ADHD symptom severity throughout intervention.  Post-test social skills scores and Prosocial Orientation behaviors were significantly higher for immediate treatment (IT) condition compared to waitlist (adjusting for baseline social skills and comorbid ODD).  For both CAI & non-CAI, post-test problematic behaviors were significantly reduced for immediate treatment group relative to waitlist (controlling for baseline problem behaviors and social skills scores). Effect sizes were large (d=1.87 to d=2.00). |
| Age | 7-9 y |  | |
|  | % Boys | 83% |  | |
|  | % ADHD | 100% | Randomization | | Yes |
|  | % Stimulant medication | 0%, Medication use was exclusion criteria | Format | | Small group sessions |
|  |  | Tx Duration | | 2 sessions/week (totaling 4.5 hours) for 12 weeks |
|  |  | Delivery target | | Children and parents |
|  |  | Outcome measures | | SSRS1 and other measures of ADHD symptoms and social behaviors |
|  |  |  | Assessment schedule | | Baseline, post-test, 6-week follow-up |
|  |  |  |  | |  |  |  |
| Corkum et al. (2010) | *N* | 16 | Design | | Single-group | Children completed weekly small group sessions at 1 of 3 schools. A new skill was targeted at each weekly session as follows: (1) making conversation (2) introducing yourself (3) making positive statements to others (4) speaking assertively (5) using courtesy words (6) asking for help (7) offering and giving help (8) giving and accepting criticism (9) joining a play activity and (10) negotiating conflict  Sessions included review of previous skill, presentation of new folktale, discussion of folktale and its relation to new skill, practice activity, and maintenance activity.  Parents and teachers positively reinforced children’s skill use (e.g., “way to go” slips that were collected each week in exchange for celebration party). | Parents and teachers rated children’s social skills as significantly higher post-test compared to baseline. Children’s self-report indicated significant improvement in social skills. Effect size was not reported. Mean ratings went from clinical range to within normal range suggesting clinical significance. |
| Age | 8-11 y | Randomization | | NA |
|  | % Boys | 63% | Format | | Small group sessions |
|  | % ADHD | 100% | Tx Duration | | 10 weekly 1-hour sessions |
|  | % Stimulant medication | 56% | Delivery target(s) | | Child and parent |
|  |  |  | Outcome measures | | SSRS1 and other measures of social behaviors |
|  |  |  | Assessment schedule | | Baseline, post-test |
|  |  |  |  | |  |  |  |
| Gardner et al. (2015) | *N* | 20 | Design | | Single-group | Adolescent sessions focused on a variety of skills including: initiating/maintaining conversations, using electronic communication, responding to peer teasing, using appropriate humor, and group entry/exit skills. Early sessions introduced foundational skills (e.g., initiating conversations, finding common interests) and gradually progressed to more advanced skills (e.g., hosting a get-together, changing a negative reputation). Weekly homework reinforced skills learned in session.  Reporting of parent session details was limited. Parents were encouraged to discuss Tx homework completion with their teen and to supervise Tx homework as appropriate (e.g., get-togethers). | The majority of adolescents reported the initiation of a new friendship at post-test (68.4% of adolescents & 78.9% of parents). Adolescents’ social knowledge improved significantly. Both parents and adolescents reported significantly increased frequency of get-togethers. Effect sizes were in moderate to large range. |
| Age | 11-16 y | Randomization | | NA |
|  | % Boys | 70% | Format | | Small group sessions |
|  | % ADHD | 100% | Tx Duration | | 14 weekly 90-minute sessions |
|  | % Stimulant medication | Medication use not discussed | Delivery target | | Adolescent and parent |
|  |  |  | Outcome measures | | Variety of measures to assess friendship and social behaviors |
|  |  |  | Assessment schedule | | Pre-test, post-test |
|  |  |  |  | |  |  |  |
| Sheridan et al. (1996) | *N* | 5 | Design | | Single-group | Children completed 10 weekly sessions, plus a follow-up booster session. Skills were introduced at each session as follows: (1) social entry (2) body basics/starting a conversation, (3) joining in (4) maintaining interactions (5) having a conversation (6) playing cooperatively (7) solving problems (8) solving arguments (9) dealing with teasing (10) using self-control (11) accepting no.  Parent sessions focused on the importance of social skills and skills of positive reinforcement, debriefing/conversing with child in a supportive manner, problem solving, goal-setting, transferring/generalizing their child’s skills to non-treatment settings, and combining these skills to help child with social difficulties. | Role play observations showed that all children had mean increases for each target behavior from pre- to post-test. School observations indicated that most children increased behaviors related to maintaining interactions. Most childrenhad an increase in social skills from below average to average at post-test.  Assessment of parent behaviors indicated that all parents had increases in problem solving skills from pre-test to post-test (mean increase = 47%); 4 out of 5 parents showed an increase in debriefing skills (mean increase = 38%); and 3 out of 5 parents showed an increase in goal setting skills (mean increase = 29%). Effect size not reported. |
| Age | 8-10 y | Randomization | | NA |
|  | % Boys | 100% | Format | | Concurrent parent and child weekly sessions |
|  | % ADHD | 100% | Tx Duration | | 10 weekly 75-minute sessions plus 1 booster session 6 weeks following last weekly session |
|  | % Stimulant medication | 100% | Delivery target | | Child and parent |
|  |  |  | Outcome measures | | SSRS1, behavioral observations |
|  |  |  | Assessment schedule | | Baseline, during Tx, 6 weeks post-test |
|  |  |  |  | |  |  |  |
| Wilkes et al. (2011)D | *N* | 28 | Design | | Single-group (*n*=14 with ADHD, *n*=14 TD peers) | Children completed 7 clinic-based sessions, weekly home-modules, and a one-month home follow-up.  *Sessions 1-2*: orientation and rapport building; therapist-modeling of prosocial behaviors & effective social skills.  *Sessions 3-6*: Therapist-modeling, peer-modeling, & self-modeling; observation and discussion of edited recording of social play with familiar TD peer from previous session  *Session 7*: Observation and discussion of edited recording of social play with familiar TD peer from previous session.  Parents completed 7 weekly 40-minute sessions with therapist who provided parent education, support training, and real-time feedback to parents while observing child dyads playing through one-way mirror. | Social play was found to improve significantly for children with ADHD and their TD peers Scores for children with ADHD improved significantly for items assessing interpersonal empathy. Effect sizes were large (d=1.3 to d=1.5). An analysis of secondary outcomes (Docking et al. (2013) showed that prediction skills (i.e., an aspect of problem solving) significantly improved from pre- to post-test. No significant difference in pragmatic skills (i.e., appropriate use of language & social skills, including timing & quantity of interaction) from pre- to post-test with small effect sizes |
| Age | 5-11 y |  | |
| % Boys | 64% | Randomization | | NA |
|  | % ADHD | 50% | Format | | Individual child sessions with video-recorded ADHD-TD dyad play time and concurrent parent sessions |
|  | % Stimulant medication | % taking meds not specified; Parents asked to maintain their child’s medication status throughout the study |  | |
|  |  | Tx Duration | | 7 weekly 40-minute sessions |
|  |  |  | Delivery target(s) | | Children and parents |
|  |  |  | Outcome measures | | CBCL2, ToP3, other measures of social functioning |
|  |  |  | Assessment schedule | | Baseline, post-test |
| C=control; NA=not applicable; NR=not reported; Tx=treatment; WLC=waitlist control  1Social Skills Rating System (SSRS; Gresham & Elliot, 1990); 2Child Behavior Checklist (CBCL; Achenbach, 1991); 3Test of Playfulness (ToP; Bundy, 2004)  Superscript letters denote the availability of additional intervention information/outcomes: ALerner et al. (2011); Mikami et al. (2010a); BCantrill et al. (2015); Wilkes-Gillan et al. (2015); Wilkes-Gillan et al. (2016c); CStorebø et al. (2011; 2015);  DDocking et al. (2013). | | | | | | | |
